# Supplementary material for: Identification of different respiratory viruses, after a cell culture step, by matrix assisted laser desorption/ionization time of flight mass spectrometry (MALDI-TOF MS)
Source: PubMed Central journal article supplement (PMC5081539; doi:10.1038/srep36082), 2016-10-27
Supplement: srep36082-s1.pdf [file srep36082-s1.pdf]

**IDENTIFICATION OF DIFFERENT RESPIRATORY VIRUSES, AFTER A CELL CULTURE STEP, BY MATRIX ASSISTED LASER DESORPTION/IONIZATION TIME OF FLIGHT MASS SPECTROMETRY (MALDI-TOF MS)**

Adriana Calderaro, Maria Cristina Arcangeletti, Isabella Rodighiero, Mirko Buttrini, Sara Montecchini, Rosita Vasile Simone, Maria Cristina Medici, Carlo Chezzi, Flora De Conto

*Department of Clinical and Experimental Medicine – Unit of Microbiology and Virology - University of Parma – Parma, Italy*

**Table S1. Peaks list of all reference virus infected cell culture, with a 100% frequency in all replicates, in the molecular weight range 2000 – 11,200 Da.**

| <b>Virus</b>                    | <b>Mass (Da)</b> | <b>S/N</b> | <b>Peak intensity (arbitrary unit)</b> | <b>Peak area</b> |
|---------------------------------|------------------|------------|----------------------------------------|------------------|
| Human influenza A<br>Neqas 1218 | 3325             | 3.9        | 907                                    | 5282             |
|                                 | 3948             | 12.4       | 2896                                   | 25729            |
|                                 | 4002             | 5          | 1176                                   | 10085            |
|                                 | 4591             | 13.9       | 3155                                   | 25665            |
|                                 | 4595             | 12.7       | 2888                                   | 22001            |
|                                 | 4667             | 8.6        | 1961                                   | 16335            |
|                                 | 4818             | 12.4       | 2893                                   | 27219            |
|                                 | 5652*            | 12.9       | 3037                                   | 37802            |
|                                 | 5673             | 8.6        | 2016                                   | 17396            |
|                                 | 6275*            | 4.8        | 1063                                   | 10242            |
|                                 | 6647*            | 6.4        | 1396                                   | 13072            |
|                                 | 6889*            | 39.4       | 8467                                   | 122509           |
|                                 | 6949             | 15.7       | 3351                                   | 30775            |
|                                 | 7002*            | 27.6       | 5945                                   | 85128            |
|                                 | 7013*            | 22.2       | 4782                                   | 62112            |
|                                 | 7097*            | 7.8        | 1623                                   | 14473            |
|                                 | 7258             | 7.1        | 1466                                   | 14482            |
| 10643                           | 8.3              | 1236       | 13744                                  |                  |
| Human influenza A<br>ATCC VR219 | 4592             | 14.1       | 2519                                   | 17981            |
|                                 | 4596             | 11.5       | 2037                                   | 14957            |
|                                 | 4669             | 6.6        | 1149                                   | 8491             |
|                                 | 4667             | 5.5        | 961                                    | 4907             |
|                                 | 5654*            | 16.6       | 2964                                   | 35803            |
|                                 | 5674             | 10.2       | 1822                                   | 15078            |
|                                 | 6889*            | 59.3       | 11721                                  | 226095           |
|                                 | 6895             | 50.2       | 9949                                   | 141152           |
|                                 | 6952             | 21.3       | 4174                                   | 37539            |
|                                 | 7005*            | 27.9       | 5394                                   | 70769            |
|                                 | 7016*            | 22         | 4260                                   | 56054            |
|                                 | 7101             | 6.1        | 1228                                   | 7518             |
|                                 | 7261             | 4.2        | 763                                    | 5632             |
|                                 | 10650            | 6.6        | 1303                                   | 14530            |
| 10890*                          | 8                | 1576       | 16757                                  |                  |
| Human influenza B<br>Neqas 7260 | 2078             | 5.6        | 1922                                   | 10023            |
|                                 | 3137             | 5.1        | 1764                                   | 9414             |
|                                 | 3323             | 4.3        | 1535                                   | 7816             |
|                                 | 3456             | 9.1        | 3291                                   | 22634            |
|                                 | 3948             | 8.6        | 3329                                   | 33066            |

|                                           |        |      |       |        |
|-------------------------------------------|--------|------|-------|--------|
|                                           | 4592   | 10.4 | 3671  | 32154  |
|                                           | 4596   | 9.4  | 3359  | 33082  |
|                                           | 4669   | 6    | 2173  | 20424  |
|                                           | 4676   | 7.1  | 2493  | 19741  |
|                                           | 6276*  | 10.7 | 4265  | 47590  |
|                                           | 6648*  | 9.5  | 3823  | 41556  |
|                                           | 6888*  | 36   | 13148 | 273979 |
|                                           | 6894   | 31.7 | 11734 | 220372 |
|                                           | 7004*  | 20.4 | 7602  | 112146 |
|                                           | 7015*  | 16.4 | 6190  | 95808  |
|                                           | 7099   | 5.2  | 1955  | 24281  |
|                                           | 7259   | 4.4  | 1635  | 17588  |
|                                           | 10646  | 6.2  | 1679  | 24962  |
|                                           | 10887* | 10.1 | 2726  | 61316  |
| Parainfluenza virus type 1<br>ATCC VR-907 | 2413   | 5    | 8387  | 34403  |
|                                           | 2505   | 5.4  | 9046  | 42116  |
|                                           | 2688   | 4.6  | 7528  | 46826  |
|                                           | 3101   | 2.8  | 4270  | 20931  |
|                                           | 3182   | 4.3  | 6532  | 28192  |
|                                           | 4083   | 9.7  | 12486 | 82799  |
|                                           | 4228   | 10   | 12590 | 86704  |
|                                           | 4243   | 2.4  | 3058  | 7997   |
|                                           | 4357   | 3.4  | 3991  | 20556  |
|                                           | 4432   | 2.9  | 3512  | 21702  |
|                                           | 4477   | 3.4  | 3891  | 25924  |
|                                           | 4774   | 5.3  | 5721  | 37244  |
|                                           | 4984** | 2.7  | 2640  | 16357  |
|                                           | 6645** | 2.9  | 1620  | 13091  |
|                                           | 8446   | 6.2  | 1821  | 22547  |
| Parainfluenza virus type 2<br>ATCC VR-92  | 3136** | 6.2  | 6866  | 16543  |
|                                           | 3271   | 3.6  | 5146  | 11178  |
|                                           | 3455** | 16   | 13419 | 57991  |
|                                           | 4588   | 3.6  | 4684  | 10135  |
|                                           | 4595   | 5.9  | 6259  | 18880  |
|                                           | 4936** | 4    | 4941  | 16202  |
|                                           | 4963** | 7.1  | 6972  | 28319  |
|                                           | 5471   | 3.1  | 4014  | 14025  |
|                                           | 5652   | 5.9  | 5736  | 21978  |
|                                           | 5673   | 2.8  | 3822  | 8818   |
|                                           | 6274** | 10.5 | 8115  | 48236  |
|                                           | 6543   | 5.8  | 5217  | 28063  |
|                                           | 6893   | 16.6 | 10741 | 59794  |
|                                           | 7272   | 5.8  | 4568  | 16236  |
|                                           | 7411   | 3.1  | 3130  | 7286   |
| 7509                                      | 8.5    | 5642 | 24738 |        |

|                                          |                                           |         |       |        |
|------------------------------------------|-------------------------------------------|---------|-------|--------|
|                                          | 8562                                      | 9       | 4716  | 35657  |
| Parainfluenza virus type 3<br>Neqas 1216 | 3138**                                    | 8.6     | 3274  | 18837  |
|                                          | 3272                                      | 2.9     | 1108  | 6217   |
|                                          | 3324**                                    | 8.5     | 3296  | 19498  |
|                                          | 3460**                                    | 15.1    | 5798  | 40760  |
|                                          | 3505                                      | 3.8     | 1451  | 9234   |
|                                          | 3820                                      | 2.3     | 930   | 6366   |
|                                          | 5477                                      | 4.7     | 2107  | 24317  |
|                                          | 6278**                                    | 16.8    | 7534  | 77197  |
|                                          | 6546                                      | 5.2     | 2278  | 26222  |
|                                          | 6650**                                    | 16.7    | 7115  | 72873  |
|                                          | 7005**                                    | 8.4     | 3720  | 43522  |
|                                          | 7514                                      | 3       | 1233  | 10942  |
|                                          | 10905                                     | 6.2     | 1711  | 26695  |
|                                          | Respiratory syncytial virus<br>Neqas 1217 | 3457*** | 19.4  | 2581   |
| 3770                                     |                                           | 7.4     | 1067  | 6456   |
| 4594                                     |                                           | 17.1    | 2708  | 25576  |
| 4670                                     |                                           | 14.1    | 2247  | 25957  |
| 4939                                     |                                           | 7.9     | 1247  | 11138  |
| 4966***                                  |                                           | 7.8     | 1237  | 10831  |
| 6278***                                  |                                           | 5.7     | 963   | 9333   |
| 6896***                                  |                                           | 61.5    | 10906 | 213725 |
| 7006***                                  |                                           | 50.5    | 8951  | 198430 |
| 7096                                     |                                           | 12.9    | 2229  | 31301  |
| 7263                                     |                                           | 9.8     | 1690  | 21396  |
| 10641                                    |                                           | 15.5    | 2097  | 48234  |
| 10891                                    |                                           | 19.3    | 2616  | 51717  |
| Adenovirus type 5<br>ATCC VR-1516        | 2188***                                   | 6.1     | 3351  | 7914   |
|                                          | 2342                                      | 21.1    | 7844  | 30919  |
|                                          | 2356                                      | 22.1    | 8161  | 32592  |
|                                          | 2438                                      | 86.6    | 24660 | 144329 |
|                                          | 2460                                      | 21.1    | 7718  | 34899  |
|                                          | 2546                                      | 14      | 5690  | 18049  |
|                                          | 2567                                      | 5       | 3195  | 8125   |
|                                          | 2601                                      | 5.1     | 3199  | 8246   |
|                                          | 2617                                      | 7.1     | 3754  | 9456   |
|                                          | 3035                                      | 60.9    | 17399 | 105590 |
|                                          | 3154                                      | 11.3    | 4464  | 22030  |
|                                          | 3624                                      | 44.6    | 11843 | 71787  |
| Adenovirus type 2<br>Neqas 9054          | 2369                                      | 23.38   | 25413 | 112146 |
|                                          | 2383                                      | 29.46   | 31098 | 132759 |
|                                          | 2397                                      | 20.52   | 22708 | 100016 |
|                                          | 2411                                      | 15.96   | 18423 | 79181  |
|                                          | 2438                                      | 59.68   | 58164 | 380413 |
|                                          | 2466                                      | 28.4    | 30001 | 141544 |

|                                |                   |       |       |        |       |
|--------------------------------|-------------------|-------|-------|--------|-------|
|                                | 2545              | 4.52  | 7688  | 24119  |       |
|                                | 2573              | 3.82  | 7009  | 18122  |       |
|                                | 3035              | 59.82 | 57806 | 400787 |       |
|                                | 3050              | 7,3   | 9946  | 48591  |       |
|                                | 3151              | 5,7   | 8437  | 41200  |       |
|                                | 3280              | 3,4   | 6298  | 20300  |       |
|                                | 3323              | 5,3   | 8077  | 24795  |       |
|                                | 3337              | 5,5   | 8197  | 29172  |       |
|                                | 5653              | 10,5  | 13009 | 90298  |       |
|                                | 5667              | 11    | 13562 | 85521  |       |
|                                | 6275***           | 11    | 13639 | 106725 |       |
|                                | 6303              | 8     | 10771 | 79641  |       |
|                                | 6648***           | 13    | 16438 | 117103 |       |
|                                | 6675              | 10,7  | 14347 | 108891 |       |
|                                | 7004***           | 21,1  | 22946 | 185871 |       |
|                                | 7017              | 25,4  | 26727 | 287679 |       |
|                                | 7030              | 21,5  | 23390 | 338884 |       |
|                                | 7315              | 3,6   | 7781  | 21868  |       |
|                                | 10971             | 13    | 9954  | 56227  |       |
| Cytomegalovirus<br>ATCC VR-977 | 2747              | 2.4   | 2475  | 10104  |       |
|                                | 2947              | 3.3   | 3639  | 18995  |       |
|                                | 3326              | 3.2   | 3568  | 19759  |       |
|                                | 3421              | 4.2   | 4592  | 24199  |       |
|                                | 3455 <sup>§</sup> | 10.6  | 11619 | 81385  |       |
|                                | 3493              | 4.8   | 5287  | 36314  |       |
|                                | 3506              | 3.7   | 4120  | 22870  |       |
|                                | 4075 <sup>§</sup> | 10.4  | 11374 | 84141  |       |
|                                | 4098              | 2.6   | 2844  | 11921  |       |
|                                | 4139 <sup>§</sup> | 9.3   | 10227 | 74504  |       |
|                                | 4207 <sup>§</sup> | 4.2   | 4616  | 26161  |       |
|                                | 4411 <sup>§</sup> | 6.3   | 6917  | 48986  |       |
|                                | 4936 <sup>§</sup> | 3.3   | 3565  | 23506  |       |
|                                | 4962 <sup>§</sup> | 3     | 3235  | 23024  |       |
|                                | 5304              | 3.7   | 3904  | 28414  |       |
|                                | 5491              | 4.3   | 4487  | 35343  |       |
|                                | 5896 <sup>§</sup> | 11.9  | 11739 | 134276 |       |
|                                | 6543 <sup>§</sup> | 4.4   | 3952  | 35529  |       |
|                                | 6652              | 4.5   | 3894  | 38426  |       |
|                                | 6843              | 7.3   | 6290  | 63876  |       |
|                                | 6929              | 4.7   | 3942  | 35701  |       |
|                                | 7008 <sup>§</sup> | 7.2   | 5785  | 54930  |       |
|                                | 7993              | 5.1   | 3440  | 29593  |       |
|                                | 8426              | 5.3   | 3600  | 44873  |       |
|                                |                   | 2188  | 8.5   | 12953  | 58414 |

|                                  |                   |      |       |        |
|----------------------------------|-------------------|------|-------|--------|
| Echovirus type 30<br>ATCC VR-322 | 2203              | 3.4  | 5597  | 27571  |
|                                  | 2812              | 3    | 5021  | 23476  |
|                                  | 3267              | 2.5  | 4149  | 17633  |
|                                  | 3421              | 2.4  | 3876  | 17488  |
|                                  | 3493              | 3    | 4846  | 26153  |
|                                  | 3505              | 2.9  | 4710  | 29837  |
|                                  | 4075 <sup>§</sup> | 14.7 | 20104 | 176259 |
|                                  | 4138 <sup>§</sup> | 11.1 | 16195 | 163306 |
|                                  | 4207 <sup>§</sup> | 7.8  | 11147 | 80119  |
|                                  | 4371              | 4.3  | 6680  | 54299  |
|                                  | 4411 <sup>§</sup> | 8.2  | 12215 | 97768  |
|                                  | 4899              | 4.9  | 7154  | 67214  |
|                                  | 4935 <sup>§</sup> | 3.4  | 5052  | 38880  |
|                                  | 4963 <sup>§</sup> | 4.3  | 6248  | 48299  |
|                                  | 5492              | 7.6  | 10622 | 105569 |
|                                  | 5748              | 3.4  | 4491  | 48414  |
|                                  | 5802              | 3.2  | 4286  | 32725  |
|                                  | 5897 <sup>§</sup> | 12.1 | 15416 | 160660 |
|                                  | 5972              | 3    | 3648  | 34510  |
|                                  | 6543 <sup>§</sup> | 6.4  | 7058  | 62836  |
|                                  | 6654              | 7    | 7473  | 73265  |
|                                  | 6875              | 5.4  | 5991  | 57639  |
|                                  | 6987              | 6.4  | 6566  | 73305  |
|                                  | 7011 <sup>§</sup> | 8.5  | 8643  | 114220 |
|                                  | 7809              | 4.4  | 3617  | 44935  |
|                                  | 7995              | 4.7  | 3997  | 45509  |
|                                  | 8426              | 5.2  | 4034  | 45497  |
|                                  | 8546              | 3.6  | 2434  | 22173  |
|                                  | 8563              | 2.9  | 2134  | 22681  |
|                                  | 8791              | 3.6  | 1975  | 24161  |
| 10218                            | 3.7               | 1823 | 20401 |        |
| Metapneumovirus                  | 3370              | 46.1 | 10996 | 77484  |
|                                  | 3441              | 52.1 | 12034 | 96025  |
|                                  | 3485**            | 59.7 | 13357 | 121780 |
|                                  | 3708              | 12.5 | 3656  | 17107  |

S/N: signal to noise ratio

\* peaks present also in MDCK SIAT1 uninfected cells spectrum.

\*\* peaks present also in LLC-MK2 uninfected cells spectrum.

\*\*\* peaks present also in Intestine 407 uninfected cells spectrum.

<sup>§</sup> peaks present also in MRC5 uninfected cells spectrum.
